# Supplementary material for: Insights into the long-term (2005–2021) spatiotemporal evolution of summer ozone production sensitivity in the Northern Hemisphere derived with OMI
Source: Copernicus journal article supplement (doi:10.5194/egusphere-2024-583), 2024-03-21
Supplement: Supplementary file 1 [file egusphere-2024-583-supplement.pdf]

Supplemental Figures

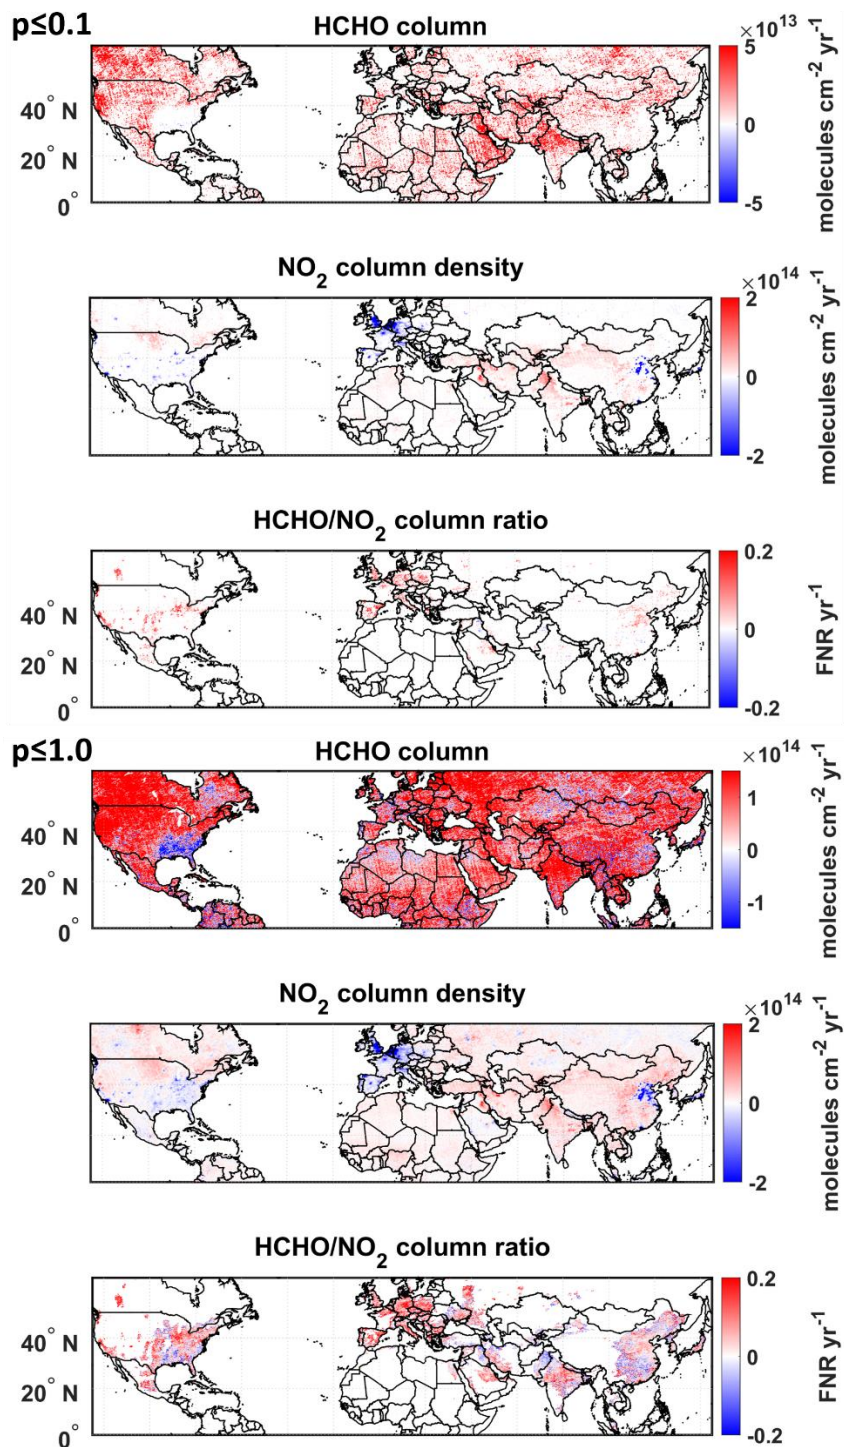

Figure S1. OMI-derived trends in summer mean (June-August) HCHO (top row) and NO<sub>2</sub> (middle row) VCDs (left column; units in molecule cm<sup>-2</sup> yr<sup>-1</sup>), and corresponding FNR values (bottom row; unitless yr<sup>-1</sup>) at 0.1° × 0.1° latitude × longitude grid cells between 2005 and 2021. Values in the bottom row are displayed only for polluted regions (OMI NO<sub>2</sub> VCD > 1.2 × 10<sup>15</sup> molecule cm<sup>-2</sup>). The white color indicates data gaps or oceanic grid cells. All trend values that are displayed are at a 99% confidence level (top panels) and for all grid cells (bottom panels).

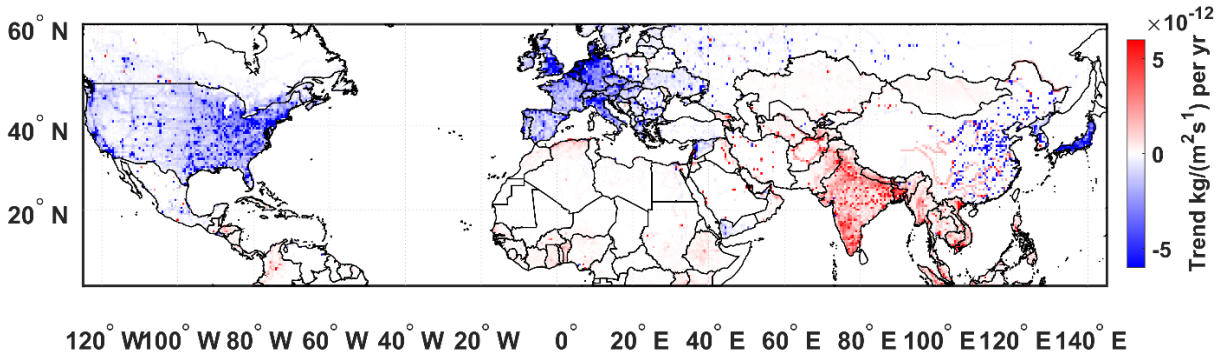

**Figure S2. Trend in CEDS anthropogenic NO<sub>x</sub> emission ( $\text{kg m}^{-2} \text{s}^{-2} \text{ yr}^{-1}$ ) between 2005-2019. Values are displayed for grids with statistically significant trends at a 95% ( $p \leq 0.05$ ) confidence level.**

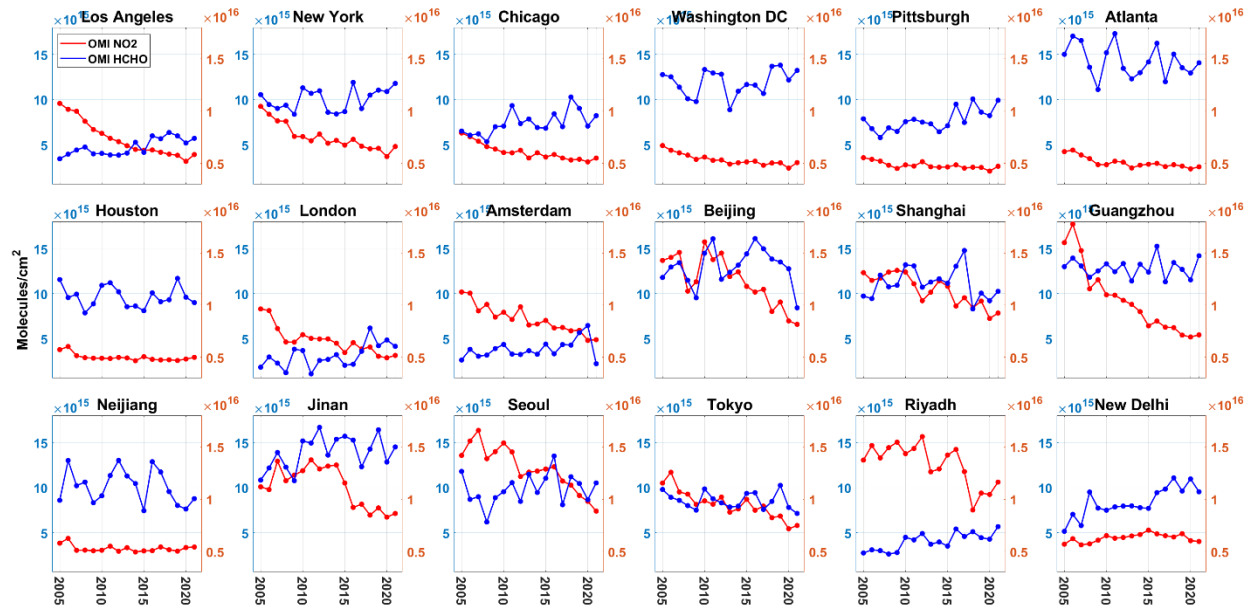

**Figure S3. Time series of OMI-derived summer mean (June-August) VCD NO<sub>2</sub> and HCHO abundances (molecules cm<sup>-2</sup>) for 18 selected cities across the North Hemisphere from 2005 to 2021.**

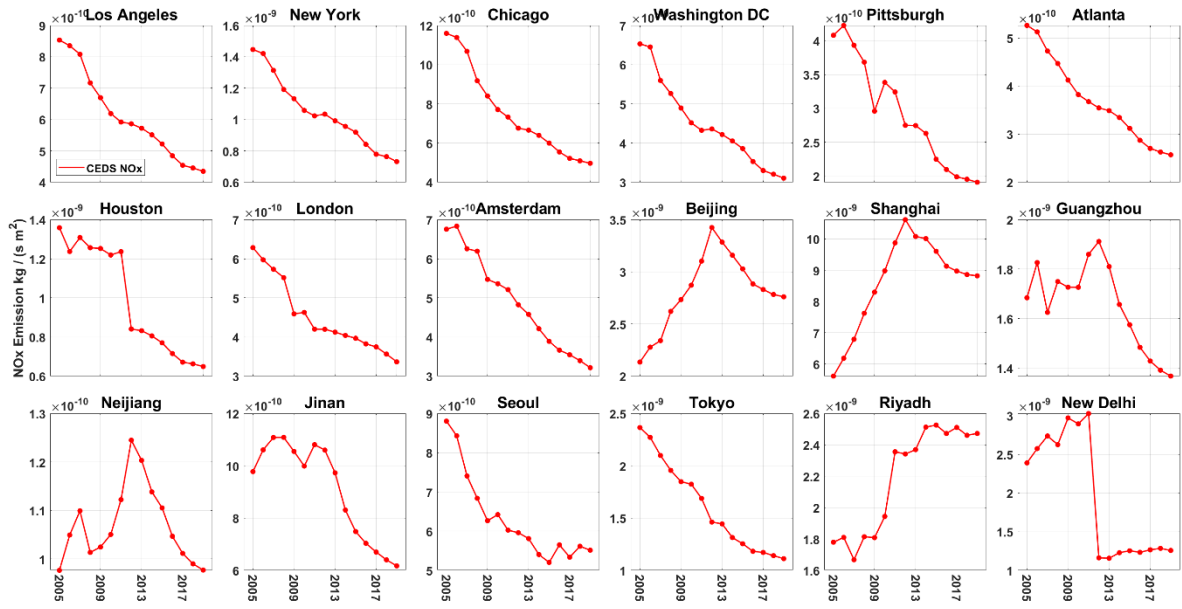

**Figure S4. Time series of CEDS summer mean (June-August) anthropogenic NO<sub>x</sub> emissions (kg NO<sub>x</sub> s<sup>-1</sup> m<sup>-2</sup>) for 18 selected cities across the North Hemisphere from 2005 to 2019.**
